*Further Observations of Comet Coddington (c 1898).* By  
John Tebbutt.

Having now brought my observations of this comet to a close, I herewith, in accordance with my promise, forward to you my second, and last, series of positions. The whole work of the two series embraces 102 nights, from 1898 June 15, to 1899 February 15, 768 comparisons, and 137 comparison stars. The observations made on June 22, 26, 29, July 3, 5, 6, 21, August 19, September 7, 10, 30, October 18, November 2, December 11, January 6, 16, 30, and February 14, 15, were more or less unsatisfactory. The comparisons of September 10 were especially so, for three reasons. The difference of north polar distance of the two objects was so great that they were with difficulty embraced within the square bar-micrometer; secondly, the comet was almost in contact with a 9th magnitude star, and therefore rendered faint; and, thirdly, the second reappearances of the comparison star, and the first disappearances of the comet at the edges of the micrometer bars, were almost simultaneous. On January 16 I could not find the comet as a separate object, but I noticed that a star of the 9th magnitude, close to its ephemeris-position, appeared slightly nebulous as it disappeared and reappeared at the edges of the bars. This star, which is identical with No. 247 of Zone  $-50^\circ$  of the *Cape Photographic Durchmusterung*, was therefore observed for the comet. The adopted mean places of the comparison stars are throughout the means, with equal weights, from the catalogues cited. An error, however, exists in the determination of the mean R.A. of Star No. 19 in my former communication. The seconds should be  $34^s.89$  instead of  $34^s.78$ , and the seconds of the apparent R.A. of the comet for July 5 will accordingly be  $20^s.02$ .

Observations of Comet Coddington (c 1898).

April 1899. of Comet Coddington (c 1898).

| Dates,<br>1898 and<br>1899. | Windsor<br>Mean<br>Time. |          | Comet—Star.   |                 | No.<br>of<br>Comps. | Comet's Apparent |               | R.A.<br>N.P.D. | Log. pΔ for<br>N.P.D. | R.A.<br>N.P.D. | Comp.<br>Star. |
|-----------------------------|--------------------------|----------|---------------|-----------------|---------------------|------------------|---------------|----------------|-----------------------|----------------|----------------|
|                             | h m s                    | h m s    | Δ R.A.<br>m s | Δ N.P.D.<br>' " |                     | R.A.<br>h m s    | N.P.D.<br>' " |                |                       |                |                |
| Oct. 31                     | 8 15 48                  | 8 15 48  | +5 37.25      | + 1 47.3        | 4                   | 15 7 23.14       | 168 47 1.6    | 0.353          | 0.625                 | 93             |                |
| Nov. 2                      | 8 20 16                  | 8 20 16  | -3 37.35      | + 4 22.9        | 2                   | 15 20 25.63      | 169 42 14.1   | 0.391          | 0.616                 | 94             |                |
| 5                           | 8 19 17                  | 8 19 17  | +3 25.12      | - 6 3.2         | 5                   | 15 44 38.45      | 171 2 43.2    | 0.463          | 0.562                 | 95             |                |
| 10                          | 7 50 36                  | 7 50 36  | -1 34.70      | + 0 51.1        | 3                   | 16 45 41.36      | 173 2 36.5    | 0.607          | 0.123                 | 96             |                |
| 14                          | 8 53 39                  | 8 53 39  | -9 27.57      | - 7 3.7         | 3                   | 18 3 46.52       | 174 10 32.0   | 0.684          | 0.102                 | 97             |                |
| Dec. 1                      | 8 46 5                   | 8 46 5   | -2 40.71      | + 6 5.8         | 5                   | 23 23 37.80      | 169 35 55.7   | 0.146          | 0.728                 | 98             |                |
| 2                           | 9 7 11                   | 9 7 11   | +8 26.14      | - 6 26.8        | 5                   | 23 31 50.90      | 169 1 31.1    | 0.173          | 0.699                 | 99             |                |
| 8                           | 8 56 31                  | 8 56 31  | -0 37.16      | - 3 13.0        | 8                   | 0 8 43.30        | 165 25 29.5   | 9.979          | 0.700                 | 100            |                |
| 8                           | 10 11 53                 | 10 11 53 | -0 21.63      | - 5 15.9        | 8                   | 0 8 58.83        | 165 23 26.6   | 0.161          | 0.550                 | 100            |                |
| 9                           | 9 2 53                   | 9 2 53   | +9 44.66      | - 0 36.8        | 4                   | 0 13 28.13       | 164 47 37.7   | 9.980          | 0.686                 | 101            |                |
| 10                          | 9 22 42                  | 9 22 42  | +4 54.07      | - 5 28.6        | 8                   | 0 17 57.55       | 164 9 2.4     | 0.018          | 0.649                 | 102            |                |
| 11                          | 9 33 57                  | 9 33 57  | +4 3.18       | - 5 17.7        | 6                   | 0 22 9.93        | 163 30 21.8   | 0.029          | 0.621                 | 103            |                |
| 13                          | 9 17 33                  | 9 17 33  | -1 48.30      | + 7 27.2        | 8                   | 0 29 45.61       | 162 13 9.8    | 9.956          | 0.636                 | 104            |                |
| 29                          | 9 7 21                   | 9 7 21   | +1 59.07      | + 4 17.6        | 6                   | 1 12 10.18       | 151 37 5.5    | 9.791          | 0.460                 | 105            |                |
| Jan. 1                      | 8 50 5                   | 8 50 5   | -0 16.88      | - 1 28.5        | 10                  | 1 18 2.10        | 149 37 55.7   | 9.734          | 0.450                 | 106            |                |
| 2                           | 9 3 20                   | 9 3 20   | +3 48.07      | + 1 7.6         | 6                   | ...              | ...           | 9.766          | 0.396                 | 107            |                |
| 2                           | 9 3 20                   | 9 3 20   | +4 6.35       | + 8 17.1        | 6                   | ...              | ...           | 9.766          | 0.396                 | 108            |                |
| 3                           | 8 51 56                  | 8 51 56  | -0 45.86      | +10 4.5         | 6                   | ...              | ...           | 9.734          | 0.408                 | 109            |                |
| 3                           | 8 51 56                  | 8 51 56  | -2 24.94      | - 0 5.3         | 6                   | ...              | ...           | 9.734          | 0.408                 | 110            |                |
| 4                           | 9 8 29                   | 9 8 29   | -6 50.07      | + 7 22.3        | 8                   | 1 23 36.90       | 147 38 41.5   | 9.772          | 0.335                 | 111            |                |
| 6                           | 9 5 14                   | 9 5 14   | -0 26.38      | - 9 28.9        | 10                  | 1 27 6.91        | 146 19 58.1   | 9.759          | 0.297                 | 112            |                |
| 7                           | 8 57 3                   | 8 57 3   | -2 59.45      | - 4 40.6        | 3                   | 1 28 49.34       | 145 41 8.0    | 9.738          | 0.301                 | 113            |                |

| Dates,<br>1898 and<br>1899. | Windsor<br>Mean<br>Time. |     | Comet—Star. |                 | No.<br>of<br>Comps. | Comet's Apparent |        | Log. $\rho\Delta$ for |        | Comp.<br>Star. |
|-----------------------------|--------------------------|-----|-------------|-----------------|---------------------|------------------|--------|-----------------------|--------|----------------|
|                             | h                        | m s | $\Delta$    | $\Delta$ N.P.D. |                     | R.A.             | N.P.D. | R.A.                  | N.P.D. |                |
| Jan. 7                      | 8 57                     | 3   | -7 10.55    | + 1 9.9         | 3                   | 1 28             | 49.58  | 145 41                | 4.0    | 114            |
| 9                           | 9 24                     | 41  | -6 23.79    | + 7 36.8        | 10                  | 1 32             | 12.78  | 144 22                | 37.0   | 115            |
| 12                          | 9 40                     | 7   | +3 10.49    | + 5 47.6        | 7                   | ...              | ...    | ...                   | ...    | 116            |
| 12                          | 9 40                     | 7   | -6 16.09    | + 8 11.5        | 7                   | 1 37             | 6.33   | 142 26                | 42.2   | 117            |
| 13                          | 8 51                     | 7   | +8 9.21     | +11 24.9        | 2                   | 1 38             | 37.98  | 141 49                | 49.8   | 118            |
| 14                          | 9 19                     | 33  | +0 26.08    | + 2 5.5         | 10                  | 1 40             | 13.85  | 141 11                | 12.8   | 119            |
| 14                          | 9 19                     | 33  | -1 55.50    | - 8 14.7        | 10                  | 1 40             | 13.92  | 141 11                | 11.8   | 120            |
| 15                          | 9 31                     | 19  | +4 7.20     | + 0 9.6         | 7                   | 1 41             | 47.70  | 140 33                | 13.2   | 121            |
| 15                          | 9 31                     | 19  | -1 1.26     | - 2 30.6        | 7                   | 1 41             | 47.51  | 140 33                | 11.5   | 122            |
| 15                          | 9 31                     | 19  | -5 12.76    | - 9 19.3        | 7                   | 1 41             | 47.86  | 140 33                | 13.1   | 123            |
| 16                          | 9 27                     | 35  | +2 31.30    | - 3 51.5        | 4                   | ...              | ...    | ...                   | ...    | 124            |
| 30                          | 9 0                      | 17  | +1 47.31    | - 3 7.6         | 6                   | ...              | ...    | ...                   | ...    | 125            |
| Feb. 1                      | 9 11                     | 19  | +7 8.66     | - 6 32.0        | 7                   | 2 6              | 4.71   | 130 29                | 23.5   | 126            |
| 1                           | 9 11                     | 19  | +6 57.91    | - 7 23.2        | 7                   | 2 6              | 5.08   | 130 29                | 22.6   | 127            |
| 2                           | 9 10                     | 48  | +5 22.86    | - 5 10.3        | 8                   | 2 7              | 25.59  | 129 56                | 11.8   | 128            |
| 3                           | 9 6                      | 2   | -6 31.68    | - 3 12.7        | 6                   | 2 8              | 45.89  | 129 23                | 25.5   | 129            |
| 3                           | 9 6                      | 2   | -7 48.41    | - 6 27.6        | 6                   | 2 8              | 45.56  | 129 23                | 23.8   | 130            |
| 6                           | 8 58                     | 58  | -7 11.84    | - 0 38.8        | 6                   | 2 12             | 44.54  | 127 46                | 48.8   | 131            |
| 6                           | 8 58                     | 58  | -7 32.63    | - 2 24.7        | 6                   | 2 12             | 44.90  | 127 46                | 46.2   | 132            |
| 9                           | 8 49                     | 9   | -4 6.46     | - 7 51.1        | 7                   | 2 16             | 40.05  | 126 12                | 40.9   | 133            |
| 10                          | 8 38                     | 32  | +1 42.14    | + 7 28.6        | 10                  | 2 17             | 56.73  | 125 42                | 4.3    | 134            |
| 13                          | 9 33                     | 38  | -1 53.39    | - 5 34.6        | 4                   | 2 21             | 52.66  | 124 10                | 22.2   | 135            |
| 14                          | 8 36                     | 26  | -2 52.27    | + 8 5.3         | 8                   | 2 23             | 6.32   | 123 41                | 38.8   | 136            |
| 15                          | 8 27                     | 54  | -3 31.78    | + 9 26.8        | 3                   | 2 24             | 22.34  | 123 12                | 42.6   | 137            |

*Mean Places of the Comparison Stars for the Beginning of the Year of Observation.*

| Comp. Star. | Mean R.A. |    |       | Red. to App. R.A. | Mean N.P.D. |    |      | Red. to App. N.P.D. | Authorities.                                          |
|-------------|-----------|----|-------|-------------------|-------------|----|------|---------------------|-------------------------------------------------------|
|             | h         | m  | s     |                   | °           | '  | "    |                     |                                                       |
| 93          | 15        | 1  | 44.04 | +1.85             | 168         | 44 | 56.4 | +17.9               | Argent. Gen. Cat. 20477; Stone, 8214.                 |
| 94          | 15        | 24 | 0.57  | +2.41             | 169         | 37 | 33.5 | +17.7               | Gilliss' Cat. 1850, 10985.                            |
| 95          | 15        | 41 | 10.48 | +2.85             | 171         | 8  | 29.3 | +17.1               | Gilliss' Cat. 1850, 11203.                            |
| 96          | 16        | 47 | 10.75 | +5.31             | 173         | 1  | 29.9 | +15.5               | Gilliss' Cat. 1850, 12063.                            |
| 97          | 18        | 13 | 5.03  | +9.06             | 174         | 17 | 23.5 | +12.2               | Gilliss' Cat. 1850, 13100.                            |
| 98          | 23        | 26 | 11.59 | +6.92             | 169         | 29 | 55.2 | -5.3                | Gilliss' Cat. 1850, 16397.                            |
| 99          | 23        | 23 | 18.03 | +6.73             | 169         | 8  | 3.1  | -5.2                | Gilliss' Cat. 1850, 16376.                            |
| 100         | 0         | 9  | 15.18 | +5.28             | 165         | 28 | 49.2 | -6.7                | Argent. Gen. Cat. 139; Stone, 68.                     |
| 101         | 0         | 3  | 38.30 | +5.17             | 164         | 48 | 21.1 | -6.6                | Argent. Gen. Cat. 45; Stone, 22.                      |
| 102         | 0         | 12 | 58.47 | +5.01             | 164         | 14 | 37.8 | -6.8                | Gilliss' Cat. 1850, 104.                              |
| 103         | 0         | 18 | 1.87  | +4.88             | 163         | 35 | 46.4 | -6.9                | Gilliss' Cat. 1850, 164.                              |
| 104         | 0         | 31 | 29.30 | +4.61             | 162         | 5  | 49.8 | -7.2                | Argent. Gen. Cat. 534.                                |
| 105         | 1         | 10 | 7.37  | +3.74             | 151         | 32 | 55.6 | -7.7                | Argent. Gen. Cat. 1170; Stone, 480; suspected double. |
| 106         | 1         | 18 | 17.63 | +1.35             | 149         | 39 | 13.0 | +11.2               | Argent. Gen. Cat. 1312; Stone, 534.                   |
| 107         | 1         | 16 | 7     | +1.29             | 148         | 56 |      | +11.2               | Equatorial. 9½ mag.                                   |
| 108         | 1         | 15 | 49    | +1.29             | 148         | 49 |      | +11.1               | Equatorial. 9½ mag.                                   |
| 109         | 1         | 22 | 29    | +1.31             | 148         | 8  |      | +11.0               | Equatorial. 9½ mag.                                   |
| 110         | 1         | 24 | 8     | +1.32             | 148         | 18 |      | +11.1               | Equatorial. 9½ mag.                                   |
| 111         | 1         | 30 | 25.64 | +1.33             | 147         | 31 | 8.2  | +11.0               | Argent. Gen. Cat. 1536; Stone, 627.                   |
| 112         | 1         | 27 | 32.05 | +1.24             | 146         | 29 | 16.1 | +10.9               | Argent. Gen. Cat. 1479.                               |
| 113         | 1         | 31 | 47.55 | +1.24             | 145         | 45 | 37.8 | +10.8               | Argent. Gen. Cat. 1559; Stone, 637.                   |
| 114         | 1         | 35 | 58.85 | +1.28             | 145         | 39 | 43.3 | +10.8               | Argent. Gen. Cat. 1635; Stone, 669.                   |
| 115         | 1         | 38 | 35.34 | +1.23             | 144         | 14 | 49.6 | +10.6               | Argent. Gen. Cat. 1681; Stone, 683.                   |
| 116         | 1         | 33 | 55    | +1.12             | 142         | 21 |      | +10.3               | Equatorial. 8¾ mag.                                   |
| 117         | 1         | 43 | 21.24 | +1.18             | 142         | 18 | 20.3 | +10.4               | Argent. Gen. Cat. 1759; Stone, 711.                   |
| 118         | 1         | 30 | 27.70 | +1.07             | 141         | 38 | 14.7 | +10.2               | Argent. Gen. Cat. 1534.                               |
| 119         | 1         | 39 | 46.66 | +1.11             | 141         | 8  | 57.1 | +10.2               | Argent. Gen. Cat. 1696; Stone, 686.                   |
| 120         | 1         | 42 | 8.30  | +1.12             | 141         | 19 | 16.3 | +10.2               | Argent. Gen. Cat. 1733; Stone, 702.                   |

| Comp. Star. | Mean R.A.  | Red. to App. R.A. | Mean N.P.D. | Red. to App. N.P.D. | Authorities.                                              |
|-------------|------------|-------------------|-------------|---------------------|-----------------------------------------------------------|
|             | h m s      | s                 | ° ' "       | "                   |                                                           |
| 121         | 1 37 39.43 | +1.07             | 140 32 53.5 | +10.1               | Argent. Gen. Cat. 1665; Stone, 677.                       |
| 122         | 1 42 47.67 | +1.10             | 140 35 32.0 | +10.1               | Argent. Gen. Cat. 1746.                                   |
| 123         | 1 46 59.49 | +1.13             | 140 42 22.2 | +10.2               | Argent. Gen. Cat. 1816; Stone, 738.                       |
| 124         | 1 40 45    | +1.07             | 140 0       | +10.0               | Equatorial. 9 mag. = Cape Phot. Durch. -50°.239.          |
| 125         | 2 1 34     | +0.93             | 131 39      | +8.7                | Equatorial. 8½ mag. = Cape Phot. Durch. -41°.192.         |
| 126         | 1 58 55.17 | +0.88             | 130 35 47.2 | +8.3                | Argent. Gen. Cat. 2046.                                   |
| 127         | 1 59 6.29  | +0.88             | 130 36 37.5 | +8.3                | Argent. Gen. Cat. 2053.                                   |
| 128         | 2 2 1.85   | +0.88             | 130 1 13.8  | +8.3                | Argent. Gen. Cat. 2110; Stone, 835.                       |
| 129         | 2 15 16.63 | +0.94             | 129 26 29.7 | +8.5                | Argent. Gen. Cat. 2377; Stone, 926.                       |
| 130         | 2 16 33.02 | +0.95             | 129 29 42.9 | +8.5                | Argent. Gen. Cat. 2406.                                   |
| 131         | 2 19 55.46 | +0.92             | 127 47 19.4 | +8.2                | Argent. Gen. Cat. 2485.                                   |
| 132         | 2 20 16.61 | +0.92             | 127 49 2.7  | +8.2                | Argent. Gen. Cat. 2489; Stone, 959.                       |
| 133         | 2 20 45.63 | +0.88             | 126 20 24.2 | +7.8                | Argent. Gen. Cat. 2506.                                   |
| 134         | 2 16 13.74 | +0.85             | 125 34 28.2 | +7.5                | Argent. Gen. Cat. 2399.                                   |
| 135         | 2 23 45.21 | +0.84             | 124 15 49.5 | +7.3                | Argent. Gen. Cat. 2565; Stone, 981; Radcliffe, 1890, 577. |
| 136         | 2 25 57.75 | +0.84             | 123 33 26.3 | +7.2                | Argent. Gen. Cat. 2617; Stone, 999.                       |
| 137         | 2 27 53.28 | +0.84             | 123 3 8.7   | +7.1                | Yarnall, 1165; Argent. Gen. Cat. 2657.                    |

Observatory: Peninsula, Windsor,  
New South Wales, 1899 Feb. 27.

*Observation of Tuttle's Comet (b 1899) made with the 30-inch Reflector of the Thompson Equatorial at the Royal Observatory, Greenwich.*

(Communicated by the Astronomer Royal.)

On March 14 a photograph of *Tuttle's* Periodical Comet was obtained with the 30-inch reflector, with exposures of 10<sup>m</sup> and 6<sup>m</sup>. The positions of the comet and of eight comparison stars, as shown by the 10<sup>m</sup> exposure, were measured, and the following place of the comet was obtained:—

| Date.   | G.M.T.  | Apparent R.A. | Apparent Decl. | Log Δ. | Corr. for R.A. | Parallax Decl. |
|---------|---------|---------------|----------------|--------|----------------|----------------|
|         | d h m s | h m s         | ° ' "          |        | s              | "              |
| Mar. 14 | 7 37 17 | 1 50 19.23    | +29 31 41.4    | 0.2480 | +0.24          | +3.1           |
